# Supplementary material for: Delivery of siRNA to Ewing Sarcoma Tumor Xenografted on Mice, Using Hydrogenated Detonation Nanodiamonds: Treatment Efficacy and Tissue Distribution
Source: Preprints.org preprint supplement (doi:10.20944/preprints202002.0115.v1), 2020-02-09
Supplement: Supplementary file 1 [file supplementary]

## Delivery of siRNA to Ewing sarcoma tumor xenografted on mice, using hydrogenated detonation nanodiamonds: treatment efficacy and tissue distribution.

Sandra Claveau, Émilie Nehlig, Sébastien Garcia-Argote, Sophie Feuillastre, Grégory Pieters, Hugues A. Girard, Jean-Charles Arnault, François Treussart and Jean-Rémi Bertrand

### Supplementary Materials

| Sample ref. | hydrodynamic diameter in intensity (nm) | hydrodynamic diameter in number (nm) | PDI  | Zeta Potential (mV) |
|-------------|-----------------------------------------|--------------------------------------|------|---------------------|
| H-DND-22    | 75                                      | 31                                   | 0.17 | +40                 |
| H-DND-23    | 72                                      | 31                                   | 0.21 | +46                 |
| H-DND-24    | 63                                      | 56                                   | 0.18 | +55                 |
| T-DND       | 93                                      | 48                                   | 0.23 | <i>n.d.</i>         |

**Table S1: Size measurement of hydrogenated and tritiated DND.** Hydrodynamic diameters are inferred from scattered light intensity time autocorrelation. The raw data are in the first column (from left); the size “in number” (second column) is obtained from raw data after correction from Rayleigh and Mie scatterings, which reinforces the contribution of the smallest nanoparticles having a lower scattering efficiency. PDI (third column): polydispersity index. Zeta potential is displayed in the fourth column. *n.d.*: not determined. H-DND-24 and T-DND are the two samples used for *in vitro* and *in vivo* siRNA delivery.

|                  | DND suspension before centrifugation (counts per minutes, cpm) | Supernatant of centrifugation (cpm) | % of the initial dose present in the supernatant |
|------------------|----------------------------------------------------------------|-------------------------------------|--------------------------------------------------|
| T-DND            | 1382796                                                        | 63341                               | 5                                                |
| purified T -DND  | 1219936                                                        | 24223                               | 2                                                |
| Urine T-DND      | 113                                                            | 131                                 | 117                                              |
| Urine T-DND:siAS | 89                                                             | 106                                 | 119                                              |
| Urine T-DND:siCt | 115                                                            | 104                                 | 90                                               |

**Table S2: Determination of free tritium in nanodiamond suspension and in mice urine after injection.** To evaluate the fraction of labile tritium the solutions were centrifuged during 3 h at acceleration 10600 *g* (50Ti rotor in XL90 Beckman ultracentrifuge). Aliquots of 100  $\mu$ L were sampled before and after centrifugation and then diluted in 8 mL final volume of deionized water before radioactivity measurement by liquid scintillation. In the case of T-DND solution, we detected 5% of the initial deionized water dose present in the supernatant. We consider that this radioactivity is due to tritiated water, since it could be fully recovered on a paper filter after evaporation and re-condensation in a closed tube. The resulted centrifugated T-DND was the “purified T-DND” injected into the mice. Note that an additional centrifugation of this purified T-DND solution still reveals 2% of activity in the supernatant, which indicates that adsorbed tritium is still present at DND surface. Then, to determine if T-DND were present in urines, a similar centrifugation protocol was applied to 2 mL of urines collected 24 h after purified T-DND injection, and diluted in 8 mL final volume of deionized water. We did not detect a significant change of radioactivity in the aqueous phase after centrifugation. Furthermore, there was no solid T-DND pellet for all the 3 conditions tested (free T-DND and for the two T-DND coated with a siRNA).
